# Supplementary material for: Oxidative Stress and Metabolic Perturbations in Wooden Breast Disorder in Chickens
Source: PLoS One. 2016 Apr 20;11(4):e0153750. doi: 10.1371/journal.pone.0153750 (PMC4838225; doi:10.1371/journal.pone.0153750)
Supplement: S3 File — (XLSX) [file pone.0153750.s003.xlsx]

## Sheet: Glycogen Assay Data
Bird ID	Line/Population	Wooden Breast Status	Glycogen Conc. (mg/g)
218373	Line 1	Affected	2.19074
218440	Line 1	Affected	6.73228
218630	Line 1	Affected	3.13801
218884	Line 1	Affected	5.88133
60	Line 2	Affected	3.15873
61	Line 2	Affected	5.90164
63	Line 2	Affected	5.98354
64	Line 2	Affected	2.0262
42717	CB	Affected	3.15144
42736	CB	Affected	1.99662
43103	CB	Affected	3.06174
43838	CB	Affected	3
218862	Line 1	Unaffcted	10.0243
219660	Line 1	Unaffcted	5.43439
219746	Line 1	Unaffcted	7.45238
219825	Line 1	Unaffcted	5.43478
52	Line 2	Unaffcted	9.25
53	Line 2	Unaffcted	6.0881
55	Line 2	Unaffcted	5.35781
58	Line 2	Unaffcted	5.53314
47246	CB	Unaffcted	4.39387
47350	CB	Unaffcted	4.68916
47379	CB	Unaffcted	5.09516
47893	CB	Unaffcted	9.90535

## Sheet: Data Summary
	Glycogen Conc. (mg/g)
Line/Population	Unaffcted	Affected	Overall
Line 1	7.09 (2.18)	4.49 (2.17)	4.41 (2.45)
Line2	6.56 (1.82)	4.27 (1.99)	5.79 (2.45)
CB	6.02 (2.61)	2.80 (0.54)	5.41 (2.15)
Overall	6.56 (2.06)	3.85 (1.75)
